# Supplementary material
Source: PubMed Central journal article supplement (PMC3678961)
Supplement: NIHMS377334-supplement-1.pdf [file NIHMS377334-supplement-1.pdf]

Attached are supplementary materials (additional examples of stimuli and analyses for time windows not reported in the manuscript) for the following paper:

Fields, E. C. & Kuperberg, G. R. (In press). It's all about you: An ERP study of emotion and self-relevance in discourse. *NeuroImage*.

The full set of stimuli is available from the first author ([Eric.Fields@tufts.edu](mailto:Eric.Fields@tufts.edu)).

Critical words are underlined and in the format pleasant/neutral/unpleasant. See the manuscript for stimuli characteristics and ratings.

| Other Condition                                                                                                                      | Self Condition                                                                                                                         |
|--------------------------------------------------------------------------------------------------------------------------------------|----------------------------------------------------------------------------------------------------------------------------------------|
| The judges all give Henry a score in the competition. It is a real <u>tribute/appraisal/insult</u> to/of his work.                   | The judges all give you a score in the competition. It is a real <u>tribute/appraisal/insult</u> to/of your work.                      |
| Sebastian is trying a new recipe for dinner tonight. It is <u>magnificent/rich/repugnant</u> when he tastes it.                      | You are trying a new recipe for dinner. It is <u>magnificent/rich/repugnant</u> when you taste it.                                     |
| Cynthia is in charge of a class of kids. The children are <u>adorable/occupied/uncontrollable</u> her first day.                     | You are in charge of a class of kids. The children are <u>adorable/occupied/uncontrollable</u> your first day.                         |
| The saleswoman is talking to Lamar in the store. She is quick to <u>help/answer/pressure</u> him that day.                           | The saleswoman is talking to you in the store. She is quick to <u>help/answer/pressure</u> you that day.                               |
| Helen is babysitting for her neighbor's kids. She cooks dinner and the children <u>love/eat/refuse</u> it.                           | You are babysitting for your neighbor's kids. You cook dinner and the children <u>love/eat/refuse</u> it.                              |
| After a long walk Rita sits on a bench. She is filled with <u>ecstasy/thoughts/despair</u> at that moment.                           | After a long walk you sit on a bench. You are filled with <u>ecstasy/thoughts/despair</u> at that moment.                              |
| Leland's family is meeting for dinner. His mother is always so <u>tender/conversational/irritable</u> around her children.           | Your family is meeting for dinner. Your mother is always so <u>tender/conversational/irritable</u> around her children.                |
| Justin is playing a game he's never tried before. Everyone around him <u>claps/watches/jeers</u> the whole time.                     | You are playing a game you've never tried before. Everyone around you <u>claps/watches/jeers</u> the whole time.                       |
| The UPS driver brings the delivery into Ella's house. She is <u>thrilled/curious/worried</u> to see it.                              | The UPS driver brings the delivery into your house. You are <u>thrilled/curious/worried</u> to see it.                                 |
| Roger and his co-workers go on a company retreat. By the end he is <u>fond/acquainted/aggravated</u> of/with everyone at his office. | You and your co-workers go on a company retreat. By the end you are <u>fond/acquainted/aggravated</u> of/with everyone at your office. |
| Janice arrives at a benefit. Other attendees think her outfit is <u>stunning/reasonable/horrendous</u> at/for the event.             | You arrive at a benefit. Other attendees think your outfit is <u>stunning/reasonable/horrendous</u> at/for the event.                  |
| The manager knows that Joanne is changing jobs. He is responsible for her <u>celebration/paperwork/problems</u> this week.           | The manager knows that you are changing jobs. He is responsible for your <u>celebration/paperwork/problems</u> this week.              |

|                                                                                                                                          |                                                                                                                                           |
|------------------------------------------------------------------------------------------------------------------------------------------|-------------------------------------------------------------------------------------------------------------------------------------------|
| Jenna goes to the bank. She notices her balance is <u>larger/congruous/smaller</u> than/with what she expected.                          | You go to the bank. You notice your balance is <u>larger/congruous/smaller</u> than/with what you expected.                               |
| Liza sees someone approaching her. She thinks he is coming to <u>greet/talk/kill</u> (to) her today.                                     | You see someone approaching you. You think he is coming to <u>greet/talk/kill</u> (to) you today.                                         |
| Gwyneth is part of a performance. The next day their show is <u>recommended/reviewed/trashed</u> in the paper.                           | You are part of a performance. The next day your show is <u>recommended/reviewed/trashed</u> in the paper.                                |
| Carlotta is learning a new dance. Her partner realizes she is a <u>natural/student/fool</u> when they try it.                            | You are learning a new dance. Your partner realizes you are a <u>natural/student/fool</u> when you try it.                                |
| Winston's parents have recently moved. He <u>enjoys/visits/resents</u> the new house.                                                    | Your parents have recently moved. You <u>enjoy/visit/resent</u> the new house.                                                            |
| Harriet goes to her high school reunion. All night she feels <u>comfortable/stirred/wretched</u> at the event.                           | You go to your high school reunion. All night you feel <u>comfortable/stirred/wretched</u> at the event.                                  |
| Ron is working on a research paper. Information on his topic is <u>ample/varied/scarce</u> in the library.                               | You are working on a research paper. Information on your topic is <u>ample/varied/scarce</u> in the library.                              |
| Larry sees his extended family over the holidays. The kids view him as an <u>inspiration/adult/idiot</u> when he's around.               | You see your extended family over the holidays. The kids view you as an <u>inspiration/adult/idiot</u> when you're around.                |
| Amanda is taking a challenging class. Her professor thinks she is quite <u>bright/vocal/stupid</u> at times.                             | You are taking a challenging class. Your professor thinks you are quite <u>bright/vocal/stupid</u> at times.                              |
| Bethany sees her old teacher at the supermarket. She feels all the <u>gratitude/memories/bitterness</u> coming back.                     | You see your old teacher at the supermarket. You feel all the <u>gratitude/memories/bitterness</u> coming back.                           |
| Mona is up late at an event. She is <u>energetic/awake/exhausted</u> throughout the evening.                                             | You are up late at an event. You are <u>energetic/awake/exhausted</u> throughout the evening.                                             |
| Ally is getting together with someone new. Everyone thinks this person is having a <u>good/discernible/troubling</u> effect on her life. | You are getting together with someone new. Everyone thinks this person is having a <u>good/discernible/troubling</u> effect on your life. |
| Greg's relatives are visiting him. They <u>encourage/stay/embarrass</u> (with) him all the time.                                         | Your relatives are visiting you. They <u>encourage/stay/embarrass</u> (with) you all the time.                                            |
| Phyllis goes shopping on Friday. She is quite <u>elated/absorbed/upset</u> by the experience.                                            | You go shopping on Friday. You are quite <u>elated/absorbed/upset</u> by the experience.                                                  |
| Nora takes a cab while on vacation. The driver is <u>helpful/silent/aggressive</u> on the way to her hotel.                              | You take a cab while on vacation. The driver is <u>helpful/silent/aggressive</u> on the way to your hotel.                                |

|                                                                                                                                                      |                                                                                                                                                       |
|------------------------------------------------------------------------------------------------------------------------------------------------------|-------------------------------------------------------------------------------------------------------------------------------------------------------|
| Geoff works for a large company. He always feels quite <u>successful/engrossed/incompetent</u> in his deals.                                         | You work for a large company. You always feel quite <u>successful/engrossed/incompetent</u> in your deals.                                            |
| Gabrielle sees her friend's newborn baby for the first time. The baby <u>beams/stares/screams</u> at her from the crib.                              | You see your friend's newborn baby for the first time. The baby <u>beams/stares/screams</u> at you from the crib.                                     |
| Georgina is watching a new movie. Right away she finds the plot <u>captivating/complex/irritating</u> in this film.                                  | You are watching a new movie. Right away you find the plot <u>captivating/complex/irritating</u> in this film.                                        |
| Karen takes her car in for an inspection. The mechanic says her engine is <u>pristine/Japanese/broken</u> in this vehicle.                           | You take your car in for inspection. The mechanic says your engine is <u>pristine/Japanese/broken</u> in this vehicle.                                |
| Bernie plans to transfer to a different university. His parents find his reasons <u>satisfying/obvious/unsatisfying</u> when he brings up the idea.  | You plan to transfer to a different university. Your parents find your reasons <u>satisfying/obvious/unsatisfying</u> when you bring up the idea.     |
| Trish starts a new job today. After her first day, her boss thinks she is <u>well-suited/adequate/problematic</u> for this job.                      | You start a new job today. After your first day, your boss thinks you are <u>well-suited/adequate/problematic</u> for this job.                       |
| Lola writes a short story. When she posts it online, people comment to say that the plot is <u>enthraling/sensible/tedious</u> throughout.           | You write a short story. When you post it online, people comment to say that the plot is <u>enthraling/sensible/tedious</u> throughout.               |
| Dylan's friend always expresses what she thinks. She says his outfit is <u>fashionable/noticeable/hideous</u> today.                                 | Your friend always expresses what she thinks. She says your outfit is <u>fashionable/noticeable/hideous</u> today.                                    |
| Ann is meeting with her adviser about an important decision. After she speaks, he <u>congratulates/responds/disagrees</u> (to/with) her immediately. | You are meeting with your adviser about an important decision. After you speak, he <u>congratulates/responds/disagrees</u> (to/with) you immediately. |
| Wanda is working late on her first day. People think she is an <u>asset/intern/imbecile</u> to/in the company.                                       | You are working late on your first day. People think you are an <u>asset/intern/imbecile</u> to/in the company.                                       |
| A man knocks on Sandra's hotel room door. She sees that he has a <u>gift/tray/gun</u> in his hand.                                                   | A man knocks on your hotel room door. You see that he has a <u>gift/tray/gun</u> in his hand.                                                         |
| After the dentist finishes his examination, he talks to Christina. He says her teeth are <u>healthy/flossed/unhealthy</u> now.                       | After the dentist finishes his examination, he talks to you. He says your teeth are <u>healthy/flossed/unhealthy</u> now.                             |
| DeAndre gets a haircut on Tuesday. People think his look is <u>stylish/altered/ridiculous</u> the next day.                                          | You get a haircut on Tuesday. People think your look is <u>stylish/altered/ridiculous</u> the next day.                                               |

|                                                                                                                                                            |                                                                                                                                                         |
|------------------------------------------------------------------------------------------------------------------------------------------------------------|---------------------------------------------------------------------------------------------------------------------------------------------------------|
| At Brendan's job there are regular meetings to discuss everyone's progress. At every meeting, he is <u>lauded/mentioned/humiliated</u> during the process. | At your job there are regular meetings to discuss everyone's progress. At every meeting, you are <u>lauded/mentioned/humiliated</u> during the process. |
| Penny sees some people hiking ahead. When she catches up, they <u>befriend/turn/ignore</u> (toward) her immediately.                                       | You see some people hiking ahead. When you catch up, they <u>befriend/turn/ignore</u> (toward) you immediately.                                         |
| Corey is looking for an apartment. The first place he sees is <u>excellent/vacant/ugly</u> when he looks around.                                           | You are looking for an apartment. The first place you see is <u>excellent/vacant/ugly</u> when you look around.                                         |
| Hank's old colleague comes back to the company this week. When she sees him for the first time she gives him a <u>present/memo/glare</u> in the hallway.   | Your old colleague comes back to the company this week. When she sees you for the first time she gives you a <u>present/memo/glare</u> in the hallway.  |
| Delia works in a restaurant. Tonight her customers leave more <u>tips/food/mess</u> than usual.                                                            | You work in a restaurant. Tonight your customers leave more <u>tips/food/mess</u> than usual.                                                           |
| Rachel tells the children to go to sleep. Her voice seems very <u>sweet/steady/angry</u> that night.                                                       | You tell the children to go to sleep. Your voice seems very <u>sweet/steady/angry</u> that night.                                                       |
| Conrad is reading his campus newspaper. He sees a picture of himself that is <u>flattering/printed/unflattering</u> on the front page.                     | You are reading your campus newspaper. You see a picture of yourself that is <u>flattering/printed/unflattering</u> on the front page.                  |
| The team is talking about Eric as a new team member. People say he is the <u>best/oldest/worst</u> one.                                                    | The team is talking about you as a new member. People say you are the <u>best/oldest/worst</u> one.                                                     |
| A man rings Leticia's doorbell. He has come to <u>thank/deliver/assault</u> (to) her today.                                                                | A man rings your doorbell. He has come to <u>thank/deliver/assault</u> (to) you today.                                                                  |
| Carter sees his co-workers daily. They are always <u>complimenting/watching/fighting</u> him during the lunch break.                                       | You see your co-workers daily. They are always <u>complimenting/watching/fighting</u> you during the lunch break.                                       |

## Main effects of Self-Relevance and interactions between Self-Relevance, Region, and/or Hemisphere in all time windows.

|                                    | Effect | df    | 100-150 ms |              | 200-300 ms |                 | 300-400 ms |              | 400-500 ms |              | 500-800 ms |              | 800-1100 ms |                 |
|------------------------------------|--------|-------|------------|--------------|------------|-----------------|------------|--------------|------------|--------------|------------|--------------|-------------|-----------------|
|                                    |        |       | F          | p            | F          | p               | F          | p            | F          | p            | F          | p            | F           | p               |
| Mid-regions omnibus ANOVA          | S      | 1,25  | 0.16       | 0.689        | 7.69       | <b>0.010</b>    | 5.71       | <b>0.025</b> | 0.15       | 0.704        | 1.85       | 0.186        | 0.07        | 0.787           |
|                                    | SxR    | 4,100 | 3.43       | <b>0.030</b> | 12.34      | <b>&lt;.001</b> | 3.38       | 0.059        | 3.06       | 0.054        | 5.41       | <b>0.007</b> | 15.61       | <b>&lt;.001</b> |
| <i>Prefrontal</i>                  | S      | 1,25  | 5.42       | <b>0.028</b> | 16.35      | <b>&lt;.001</b> | 6.01       | <b>0.022</b> | 0.82       | 0.372        | 5.37       | <b>0.029</b> | 11.80       | <b>0.002</b>    |
| <i>Frontal</i>                     | S      | 1,25  | 0.01       | 0.915        | 19.79      | <b>&lt;.001</b> | 9.20       | <b>0.006</b> | 2.48       | 0.128        | 4.99       | <b>0.035</b> | 4.38        | <b>0.047</b>    |
| <i>Central</i>                     | S      | 1,25  | 0.53       | 0.472        | 5.41       | <b>0.028</b>    | 3.78       | 0.063        | 0.19       | 0.668        | 2.57       | 0.122        | 0.09        | 0.773           |
| <i>Parietal</i>                    | S      | 1,25  | 1.44       | 0.242        | 1.24       | 0.277           | 1.76       | 0.196        | 0.19       | 0.665        | 0.01       | 0.918        | 2.63        | 0.117           |
| <i>Occipital</i>                   | S      | 1,25  | 1.82       | 0.190        | 3.04       | 0.093           | 0.06       | 0.815        | 2.49       | 0.127        | 1.62       | 0.215        | 6.72        | <b>0.016</b>    |
| Peripheral regions omnibus ANOVA   | S      | 1,25  | 0.62       | 0.438        | 5.17       | <b>0.032</b>    | 5.35       | <b>0.029</b> | 0.11       | 0.739        | 3.22       | 0.085        | 0.51        | 0.480           |
|                                    | SxR    | 4,100 | 3.86       | 0.061        | 15.37      | <b>0.001</b>    | 4.68       | <b>0.040</b> | 4.35       | <b>0.047</b> | 7.69       | <b>0.010</b> | 30.74       | <b>&lt;.001</b> |
|                                    | SxH    | 1,25  | 0.94       | 0.341        | 1.76       | 0.197           | 0.67       | 0.420        | 0.03       | 0.860        | 0.17       | 0.688        | 0.06        | 0.806           |
|                                    | SxRxH  | 2,50  | 0.21       | 0.773        | 0.63       | 0.435           | 0.02       | 0.880        | 0.50       | 0.485        | 2.00       | 0.170        | 0.51        | 0.480           |
| <i>Frontal (left &amp; right)</i>  | S      | 1,25  | 0.05       | 0.832        | 13.14      | <b>0.001</b>    | 7.87       | <b>0.010</b> | 1.41       | 0.247        | 7.91       | <b>0.009</b> | 10.12       | <b>0.004</b>    |
| <i>Parietal (left &amp; right)</i> | S      | 1,25  | 2.56       | 0.122        | 0.05       | 0.831           | 0.77       | 0.390        | 0.43       | 0.516        | 0.02       | 0.901        | 3.06        | 0.093           |

Follow-up analyses were carried out in individual regions only when the mid-regions omnibus ANOVA showed a significant or marginally significant (<.10) interaction between Self-Relevance and Region. Follow-up analyses were carried out in peripheral regions (collapsed over the left and right hemisphere) only when the peripheral regions omnibus ANOVA showed a significant or marginally significant (<.10) interaction between Self-Relevance and Region (as can be seen, there were no significant interactions involving Hemisphere). Effects significant at an alpha of .05 are shaded gray and shown in bold font. S = Self-Relevance, R = Region, H = Hemisphere.

**Main effects of Emotion and interactions between Emotion, Region, and/or Hemisphere in the 300-400 ms, 400-500 ms, 500-800 ms and 800-1100 ms time windows.**

|                                  | Effect    | df    | 300-400 ms |              |                | 400-500 ms |                 |                | 500-800 ms |                 |                | 800-1100 ms |              |                |
|----------------------------------|-----------|-------|------------|--------------|----------------|------------|-----------------|----------------|------------|-----------------|----------------|-------------|--------------|----------------|
|                                  |           |       | F          | p            | Post Hoc Tests | F          | p               | Post Hoc Tests | F          | p               | Post Hoc Tests | F           | p            | Post Hoc Tests |
| Mid-regions omnibus ANOVA        | E         | 2,50  | 3.29       | 0.057        | U>N, P=N, U>P  | 17.33      | <b>&lt;.001</b> | U>N, P=N, U>P  | 9.78       | <b>&lt;.001</b> | U>N, P=N, U>P  | 2.44        | 0.099        | U=N, P=N, U=P  |
|                                  | ExR       | 8,200 | 2.83       | <b>0.042</b> |                | 4.81       | <b>0.004</b>    |                | 9.85       | <b>&lt;.001</b> |                | 2.72        | 0.053        |                |
| <i>Prefrontal</i>                | E         | 2,50  | 4.86       | <b>0.015</b> | U>N, P=N, U>P  | 3.05       | 0.057           | U=N, P=N, U>P  | 3.57       | <b>0.036</b>    | U=N, P<N, U=P  | 2.46        | 0.100        |                |
| <i>Frontal</i>                   | E         | 2,50  | 4.98       | <b>0.014</b> | U>N, P=N, U>P  | 23.83      | <b>&lt;.001</b> | U>N, P=N, U>P  | 7.77       | <b>0.002</b>    | U=N, P=N, U>P  | 5.67        | <b>0.007</b> | U=N, P<N, U=P  |
| <i>Central</i>                   | E         | 2,50  | 2.55       | 0.097        | U>N, P=N, U=P  | 18.11      | <b>&lt;.001</b> | U>N, P=N, U>P  | 11.78      | <b>&lt;.001</b> | U>N, P=N, U>P  | 1.38        | 0.261        |                |
| <i>Parietal</i>                  | E         | 2,50  | 1.28       | 0.284        |                | 12.38      | <b>&lt;.001</b> | U>N, P=N, U=P  | 19.16      | <b>&lt;.001</b> | U>N, P>N, U>P  | 0.43        | 0.647        |                |
| <i>Occipital</i>                 | E         | 2,50  | 0.52       | 0.570        |                | 3.38       | <b>0.044</b>    | U>N, P=N, U=P  | 11.77      | <b>&lt;.001</b> | U>N, P>N, U=P  | 2.83        | 0.073        | U<N, P=N, U<P  |
| Peripheral regions omnibus ANOVA | E         | 2,50  | 1.87       | 0.172        |                | 15.40      | <b>&lt;.001</b> | U>N, P=N, U>P  | 12.29      | <b>&lt;.001</b> | U>N, P=N, U>P  | 1.89        | 0.162        | U=N, P=N, U=P  |
|                                  | ExR       | 2,50  | 1.46       | 0.243        |                | 2.42       | 0.100           |                | 13.47      | <b>&lt;.001</b> |                | 4.33        | <b>0.019</b> |                |
|                                  | ExH       | 2,50  | 0.22       | 0.806        |                | 0.07       | 0.892           |                | 1.13       | 0.330           |                | 2.18        | 0.130        |                |
|                                  | ExRxH     | 2,50  | 0.02       | 0.980        |                | 1.69       | 0.198           |                | 5.85       | <b>0.006</b>    |                | 5.68        | <b>0.007</b> |                |
| <i>Frontal</i>                   | E (right) | 2,50  | --         | --           |                | --         | --              |                | 7.20       | <b>0.002</b>    | U=N, P=N, U>P  | 2.89        | 0.065        | U=N, P<N, U=P  |
|                                  | E (left)  | 2,50  | --         | --           |                | --         | --              |                | 4.72       | <b>0.015</b>    | U=N, P<N, U>P  | 4.11        | <b>0.023</b> | U=N, P<N, U>P  |
| <i>Parietal</i>                  | E (right) | 2,50  | --         | --           |                | --         | --              |                | 17.89      | <b>&lt;.001</b> | U>N, P>N, U>P  | 2.92        | 0.064        | U<N, P=N, U=P  |
|                                  | E (left)  | 2,50  | --         | --           |                | --         | --              |                | 24.11      | <b>&lt;.001</b> | U>N, P>N, U>P  | 0.33        | 0.712        |                |

Analyses in individual regions were only carried out when the omnibus mid-regions ANOVA showed a significant or marginally significant (<.10) interaction between Emotion and Region, and when the peripheral regions ANOVA showed an interaction with Region and/or Hemisphere. Effects significant at an alpha of .05 are shaded gray and shown in a bold font. Post-hoc LSD tests were conducted to follow-up significant and marginally significant effects of Emotion. E = Emotion, R = Region, H = Hemisphere, U = Unpleasant, N = Neutral, P = Pleasant.

**Effects of Self-Relevance at each level of Emotion within the 500-800 ms and 800-1100 ms time windows.**

|                                    |        |       | 500-800 ms |       |         |              |            |       | 800-1100 ms |              |         |              |            |              |
|------------------------------------|--------|-------|------------|-------|---------|--------------|------------|-------|-------------|--------------|---------|--------------|------------|--------------|
|                                    | Effect | df    | Pleasant   |       | Neutral |              | Unpleasant |       | Pleasant    |              | Neutral |              | Unpleasant |              |
|                                    |        |       | F          | p     | F       | p            | F          | p     | F           | p            | F       | p            | F          | p            |
| Mid-regions omnibus ANOVA          | S      | 1,25  | 0.36       | 0.554 | 20.18   | <b>0.000</b> | 0.11       | 0.741 | 1.37        | 0.253        | 9.72    | <b>0.005</b> | 0.52       | 0.477        |
|                                    | SxR    | 4,100 | 2.53       | 0.095 | 5.94    | <b>0.008</b> | 0.33       | 0.757 | 3.95        | <b>0.028</b> | 5.28    | <b>0.010</b> | 2.30       | 0.108        |
| <i>Prefrontal</i>                  | S      | 1,25  | 1.19       | 0.285 | 11.15   | <b>0.003</b> | --         | --    | 0.83        | 0.370        | 11.36   | <b>0.002</b> | --         | --           |
| <i>Frontal</i>                     | S      | 1,25  | 0.02       | 0.901 | 23.20   | <b>0.000</b> | --         | --    | 0.08        | 0.784        | 15.88   | <b>0.001</b> | --         | --           |
| <i>Central</i>                     | S      | 1,25  | 0.32       | 0.577 | 19.60   | <b>0.000</b> | --         | --    | 1.61        | 0.216        | 8.14    | <b>0.009</b> | --         | --           |
| <i>Parietal</i>                    | S      | 1,25  | 2.66       | 0.115 | 7.54    | <b>0.011</b> | --         | --    | 4.49        | <b>0.044</b> | 2.19    | 0.152        | --         | --           |
| <i>Occipital</i>                   | S      | 1,25  | 1.40       | 0.247 | 0.04    | 0.837        | --         | --    | 3.56        | 0.071        | 0.01    | 0.920        | --         | --           |
| Peripheral regions omnibus ANOVA   | S      | 1,25  | 0.01       | 0.916 | 15.12   | <b>0.001</b> | 0.00       | 0.956 | 0.97        | 0.333        | 7.30    | <b>0.012</b> | 0.06       | 0.811        |
|                                    | SxR    | 1,25  | 2.52       | 0.125 | 3.66    | 0.067        | 0.52       | 0.477 | 4.75        | <b>0.039</b> | 8.18    | <b>0.008</b> | 8.89       | <b>0.006</b> |
|                                    | SxH    | 1,25  | 1.71       | 0.203 | 0.01    | 0.926        | 0.14       | 0.710 | 3.10        | 0.091        | 0.02    | 0.879        | 1.02       | 0.321        |
|                                    | SxRxH  | 1,25  | 2.81       | 0.106 | 0.99    | 0.330        | 2.27       | 0.145 | 3.63        | 0.068        | 2.09    | 0.161        | 1.10       | 0.304        |
| <i>Frontal (left &amp; right)</i>  | S      | 1,25  | --         | --    | 14.50   | <b>0.001</b> | --         | --    | 0.07        | 0.79         | 13.72   | <b>0.001</b> | 0.58       | 0.45         |
| <i>Parietal (left &amp; right)</i> | S      | 1,25  | --         | --    | 3.55    | 0.071        | --         | --    | 4.76        | <b>0.04</b>  | 0.62    | 0.439        | 1.59       | 0.22         |

We resolved significant Emotion x Self-Relevance interactions by examining effects of Self-Relevance at each level of Emotion (see Table 6 for effects of Emotion at each level of Self-Relevance). Follow-up analyses were carried out in individual regions only when the mid-regions omnibus ANOVA showed a significant or marginally significant (<.10) interaction between Self-Relevance and Region. Follow-up analyses were carried out in peripheral regions (collapsed over the left and right hemisphere) only when the peripheral regions omnibus ANOVA showed a significant or marginally significant (<.10) interaction between Self-Relevance and Region (as can be seen, there were no significant effects involving Hemisphere). Effects significant at an alpha of .05 are shaded gray and shown in a bold font. S = Self-Relevance, R = Region, H = Hemisphere.



**Effects of Emotion at each level of Self-Relevance within the 500-800 ms and 800-1100 ms time windows.**

|                                  |           |       | 500-800 ms |                 |                |       |                 |                | 800-1100 ms |              |                |      |              |                |
|----------------------------------|-----------|-------|------------|-----------------|----------------|-------|-----------------|----------------|-------------|--------------|----------------|------|--------------|----------------|
|                                  | Effect    | df    | Other      |                 |                | Self  |                 |                | Other       |              |                | Self |              |                |
|                                  |           |       | F          | p               | Post Hoc Tests | F     | p               | Post Hoc Tests | F           | p            | Post Hoc Tests | F    | p            | Post Hoc Tests |
| Mid-regions omnibus ANOVA        | E         | 2,50  | 12.05      | <b>&lt;.001</b> | U>N, P>N, U>P  | 2.32  | 0.111           |                | 0.41        | 0.658        |                | 5.34 | <b>0.008</b> | U<N, P<N, U=P  |
|                                  | ExR       | 8,200 | 5.38       | <b>0.003</b>    |                | 7.96  | <b>&lt;.001</b> |                | 1.68        | 0.179        |                | 1.56 | 0.202        |                |
| <i>Prefrontal</i>                | E         | 2,50  | 2.66       | 0.082           | U=N, P=N, U>P  | 4.54  | <b>0.016</b>    | U<N, P<N, U=P  | --          | --           |                | --   | --           |                |
| <i>Frontal</i>                   | E         | 2,50  | 9.08       | <b>&lt;.001</b> | U>N, P=N, U>P  | 4.54  | <b>0.019</b>    | U=N, P<N, U>P  | --          | --           |                | --   | --           |                |
| <i>Central</i>                   | E         | 2,50  | 11.91      | <b>&lt;.001</b> | U>N, P>N, U=P  | 2.93  | 0.065           | U=N, P=N, U>P  | --          | --           |                | --   | --           |                |
| <i>Parietal</i>                  | E         | 2,50  | 13.45      | <b>&lt;.001</b> | U>N, P>N, U=P  | 4.65  | <b>0.015</b>    | U>N, P=N, U>P  | --          | --           |                | --   | --           |                |
| <i>Occipital</i>                 | E         | 2,50  | 7.96       | <b>0.001</b>    | U>N, P>N, U=P  | 5.59  | <b>0.011</b>    | U>N, P>N, U=P  | --          | --           |                | --   | --           |                |
| Peripheral regions omnibus ANOVA | E         | 2,50  | 11.48      | <b>&lt;.001</b> | U>N, P=N, U>P  | 3.39  | <b>0.044</b>    | U=N, P=N, U>P  | 0.50        | 0.608        |                | 4.13 | <b>0.022</b> | U=N, P<N, U=P  |
|                                  | ExR       | 2,50  | 6.32       | <b>0.006</b>    |                | 10.27 | <b>&lt;.001</b> |                | 1.99        | 0.152        |                | 2.03 | 0.144        |                |
|                                  | ExH       | 2,50  | 0.34       | 0.709           |                | 1.53  | 0.228           |                | 2.63        | 0.091        |                | 1.47 | 0.240        |                |
|                                  | ExRxH     | 2,50  | 6.53       | <b>0.004</b>    |                | 1.33  | 0.273           |                | 6.96        | <b>0.003</b> |                | 0.79 | 0.457        |                |
| <i>Frontal</i>                   | E (right) | 2,50  | 5.49       | <b>0.007</b>    | U>N, P=N, U>P  | 4.98  | <b>0.011</b>    | U=N, P<N, U>P  | 0.30        | 0.740        |                | --   | --           |                |
|                                  | E (left)  | 2,50  | 3.60       | <b>0.035</b>    | U=N, P=N, U>P  | 3.06  | 0.059           | U=N, P<N, U=P  | 2.11        | 0.136        |                | --   | --           |                |
| <i>Parietal</i>                  | E (right) | 2,50  | 10.17      | <b>&lt;.001</b> | U>N, P>N, U=P  | 6.07  | <b>0.004</b>    | U>N, P=N, U>P  | 1.05        | 0.357        |                | --   | --           |                |
|                                  | E (left)  | 2,50  | 16.97      | <b>&lt;.001</b> | U>N, P>N, U=P  | 7.05  | <b>0.002</b>    | U>N, P=N, U=P  | 2.58        | 0.086        | U=N, P>N, U=P  | --   | --           |                |

We resolved significant Emotion x Self-Relevance interactions by examining effects of Self-Relevance at each level of Emotion (see Table 5 for effects of Self-Relevance at each level of Emotion). Follow-up analyses in individual regions were only carried out when the omnibus mid-regions ANOVA showed a significant or marginally significant (<.10) interaction between Emotion and Region, and when the peripheral regions ANOVA showed an interaction with Region and/or Hemisphere. Effects significant at an alpha of .05 are shaded gray and shown in a bold font. Posthoc LSD tests were conducted to follow-up significant and marginally significant effects of Emotion. E = Emotion, R = Region, H = Hemisphere, U = Unpleasant, N = Neutral, P = Pleasant.
